# Supplementary material
Source: PubMed Central journal article supplement (PMC7187603)
Supplement: AAC.01675-19-s0001.pdf [file AAC.01675-19-s0001.pdf]

TABLE S1. Primers used in this study

| Primers  | Sequence (5'-3')            | Purpose                                | Reference  |
|----------|-----------------------------|----------------------------------------|------------|
| iutA-F   | CCAAC TCCG TCCG TACC CTGTCA | <i>iucABCDiutA</i> detection           | 1          |
| iutA-R   | CGAGG GATCGACGATGGTGTCT     |                                        |            |
| iroB-F   | AGAGG CTGGATTGGTGGCGTTTG    | <i>iroBCDN</i> detection               | 1          |
| iroB-R   | CGATCTGTGGAATACCGGCGTGTAG   |                                        |            |
| rmpA-F   | ACTGGGCTACCTCTGCTTCA        | <i>rmpA</i> detection                  | 1          |
| rmpA-R   | CTTGCATGAGCCATCTTTCA        |                                        |            |
| rmpA2-F  | AGAGTATTGGTTGATAGCCGGA      | <i>rmpA2</i> detection                 | 1          |
| rmpA2-R  | GAAATGTCAAGCCACATCCATTG     |                                        |            |
| orf7-F   | AGCTTAAACTCGCCGTTATC        | Left junction of virulence cluster     | This study |
| iroN-R   | CCAGAATAAGATCTTGGCCG        |                                        |            |
| rmpA-J-F | CTGCAGTCAACCAATACTCT        | Right junction of virulence cluster    | This study |
| Orf16-R  | TTGTTCCCTGGTAGACAATGG       |                                        |            |
| ompC-F   | TTCAGACCAAAGCGAACATA        | Left junction of ICE <i>Kpl</i>        | This study |
| int-R    | CATGCTTCCAGATAATCCGA        |                                        |            |
| orf40-F  | TACGAGATCATAGCGAGACT        | Right junction of ICE <i>Kpl</i>       | This study |
| yeaP-R   | TGAAATTAGCCGGACTTCAT        |                                        |            |
| KPC-F    | CGTCTAGTTCTGCTGTCTTG        | <i>bla</i> <sub>KPC</sub> detection    | 2          |
| KPC-R    | CTTGTCATCCTTGTTAGGCG        |                                        |            |
| NDM-F    | GGTTTGGCGATCTGGTTTTTC       | <i>bla</i> <sub>NDM</sub> detection    | 2          |
| NDM-R    | CGGAATGGCTCATCACGATC        |                                        |            |
| IMP-F    | GGAATAGAGTGGCTTAAYTCTC      | <i>bla</i> <sub>IMP</sub> detection    | 2          |
| IMP-R    | GGTTTAAAYAAAACAACCACC       |                                        |            |
| VIM-F    | GATGGTGTTTGGTCGCATA         | <i>bla</i> <sub>VIM</sub> detection    | 2          |
| VIM-R    | CGAATGCGCAGCACCAG           |                                        |            |
| OXA-48-F | GCGTGGTTAAGGATGAACAC        | <i>bla</i> <sub>OXA-48</sub> detection | 2          |
| OXA-48-R | CATCAAGTTCAACCCAACCG        |                                        |            |

TABLE S2. Antimicrobial susceptibility testing of *K. pneumoniae* RJY9645 and the control strains

| Strain   | ST | MIC (µg/ml) |     |     |      |      |      |     |       |       |             |
|----------|----|-------------|-----|-----|------|------|------|-----|-------|-------|-------------|
|          |    | CAZ         | FEP | ATM | TZP  | IMP  | MEM  | AMK | LEV   | TGC   | Polymycin B |
| RJY9645  | 35 | ≥64         | ≥64 | ≤1  | ≥128 | 16   | 64   | 0.5 | ≤0.25 | ≤0.25 | 0.5         |
| HAP-Kp11 | 11 | ≥64         | ≥64 | ≥64 | ≥128 | >128 | >128 | ≥64 | ≥8    | ≤0.25 | 0.5         |
| LA-Kp23  | 23 | ≤1          | ≤1  | ≤1  | ≤4   | ≤0.5 | ≤0.5 | 0.5 | ≤0.25 | ≤0.25 | ≤0.25       |

<sup>a</sup> CAZ, ceftazidime; FEP, cefepime; ATM, aztreonam; TZP, piperacillin/tazobactam; IMP, imipenem; MEM, meropenem; AMK, amikacin; LVX, levofloxacin; TGC, tigecycline.

TABLE S3. Reference strains used for the whole genome based phylogenetic analysis

| Strain       | Sequence<br>type (ST) | GenBank<br>accession no. | Virulence genes <sup>a</sup> |              |                |                    |
|--------------|-----------------------|--------------------------|------------------------------|--------------|----------------|--------------------|
|              |                       |                          | <i>rmpA</i>                  | <i>rmpA2</i> | <i>iroBCDN</i> | <i>iucABCDiutA</i> |
| NY9          | ST340                 | NZ_CP012300              | -                            | -            | -              | -                  |
| Kp-Goe-33208 | ST101                 | CP018447                 | -                            | -            | -              | -                  |
| AR-0049      | ST11                  | CP018816                 | -                            | -            | -              | -                  |
| HS11286      | ST11                  | NC_016845                | -                            | -            | -              | -                  |
| SWU01        | ST11                  | CP018454                 | -                            | -            | -              | -                  |
| J1           | ST111                 | NZ_CP013711              | -                            | -            | -              | -                  |
| NUHL24835    | ST14                  | NZ_CP014004              | -                            | -            | -              | -                  |
| 342          | ST146                 | NC_011283                | -                            | -            | -              | -                  |
| AATZP        | ST147                 | CP014755                 | -                            | -            | -              | -                  |
| KP5          | ST147                 | CP012426                 | -                            | -            | -              | -                  |
| KP36         | ST15                  | CP017385                 | -                            | -            | -              | -                  |
| Kp-Goe-39795 | ST15                  | CP018458                 | -                            | -            | -              | -                  |
| KPNIH29      | ST1518                | NZ_CP009863              | -                            | -            | -              | -                  |
| W14          | ST1536                | CP015753                 | -                            | -            | -              | -                  |
| UCLAOXA232KP | ST16                  | CP012561                 | -                            | -            | -              | -                  |
| XH209        | ST17                  | NZ_CP009461              | -                            | -            | -              | -                  |
| 1084         | ST23                  | NC_018522                | -                            | -            | -              | -                  |
| NTUH-K2044   | ST23                  | NC_012731                | +                            | -            | +              | +                  |
| RJF999       | ST23                  | NZ_CP014010              | +                            | +            | +              | +                  |
| CAV1042      | ST244                 | CP018671                 | -                            | -            | -              | -                  |
| 1756         | ST2549                | CP019219                 | -                            | -            | -              | -                  |
| CAV1453      | ST258                 | CP018356                 | -                            | -            | -              | -                  |
| KPNIH36      | ST258                 | CP014647                 | -                            | -            | -              | -                  |
| MNCRE69      | ST258                 | CP018427                 | -                            | -            | -              | -                  |
| Kpn223       | ST273                 | CP015025                 | -                            | -            | -              | -                  |
| KpN01        | ST278                 | NZ_CP012987              | -                            | -            | -              | -                  |

|               |       |             |   |   |   |   |
|---------------|-------|-------------|---|---|---|---|
| KpN06         | ST279 | NZ_CP012992 | - | - | - | - |
| KP-1          | ST29  | NZ_CP012883 | - | - | - | - |
| DHQP1002001   | ST34  | CP016811    | - | - | - | - |
| CAV1417       | ST340 | CP018352    | - | - | - | - |
| KPNIH39       | ST37  | CP014762    | - | - | - | - |
| RJF293        | ST374 | NZ_CP014008 | + | + | + | + |
| KCTC-2242     | ST375 | NC_017540   | + | + | + | + |
| MGH-78578     | ST38  | NC_009648   | - | - | - | - |
| TGH10         | ST383 | NZ_CP012744 | - | - | - | - |
| CN1           | ST392 | CP015382    | - | - | - | - |
| Kp-Goe-62629  | ST395 | CP018364    | - | - | - | - |
| Kp13          | ST442 | NZ_CP003999 | - | - | - | - |
| CAV1016       | ST45  | CP017934    | - | - | - | - |
| KPPR1         | ST493 | NZ_CP009208 | - | - | - | - |
| GCA-001705385 | ST512 | CP015822    | - | - | - | - |
| 234-12        | ST514 | NZ_CP011313 | - | - | - | - |
| 1158          | ST65  | NZ_CP006722 | - | - | - | - |
| Kp52.145      | ST66  | NZ_FO834906 | - | - | + | + |
| CG43          | ST86  | NC_022566   | + | + | + | + |

<sup>a</sup> -, negative; +, positive.

TABLE S4. Integrative and conjugative elements (ICEs) identified on *K. pneumoniae* RJY9645 chromosome

| ICE  | Region              | Length<br>(kb) | G+C% | Features                                                                  |
|------|---------------------|----------------|------|---------------------------------------------------------------------------|
| ICE1 | 1,324,606-1,346,038 | 21.4           | 58.9 | Prophage                                                                  |
| ICE2 | 1,728,519-1,803,969 | 75.4           | 51.4 | ICE <i>Kp1</i> (Yersiniabactin, salmochelin and type IV secretion system) |
| ICE3 | 1,982,844-2,005,955 | 23.1           | 56.8 | Type VI secretion system (T6SS-1)                                         |
| ICE4 | 2,905,079-2,932,166 | 27.1           | 60.4 | Type VI secretion system (T6SS-2)                                         |
| ICE5 | 2,987,984-3,055,008 | 67.0           | 52.5 | Prophage                                                                  |

FIGURE S1. PFGE and S1-PFGE analysis of *K. pneumoniae* RJY9645. (A) PFGE analysis of *K. pneumoniae* RJY9645 and RJY9699. The two strains shared identical PFGE patterns. (B) S1-PFGE analysis of *K. pneumoniae* RJY9645. The black arrows indicated the three plasmids in this strain.

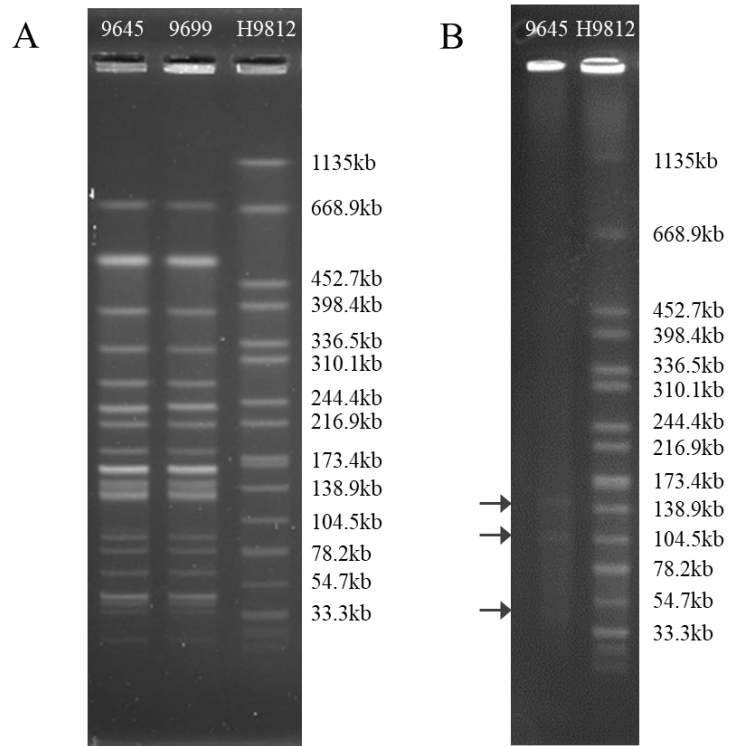

Figure S2. Phylogenetic analysis of *K. pneumoniae* RJY9645. The whole genomes of reference strains were downloaded from GenBank and were listed with strain name and sequence type (ST). The genomes were aligned using Muscle (<http://www.drive5.com/muscle>) and homologous blocks from each genome were concatenated. A maximum-likelihood phylogeny was generated with 1000 bootstrap replicates using RAxML version 8.0.

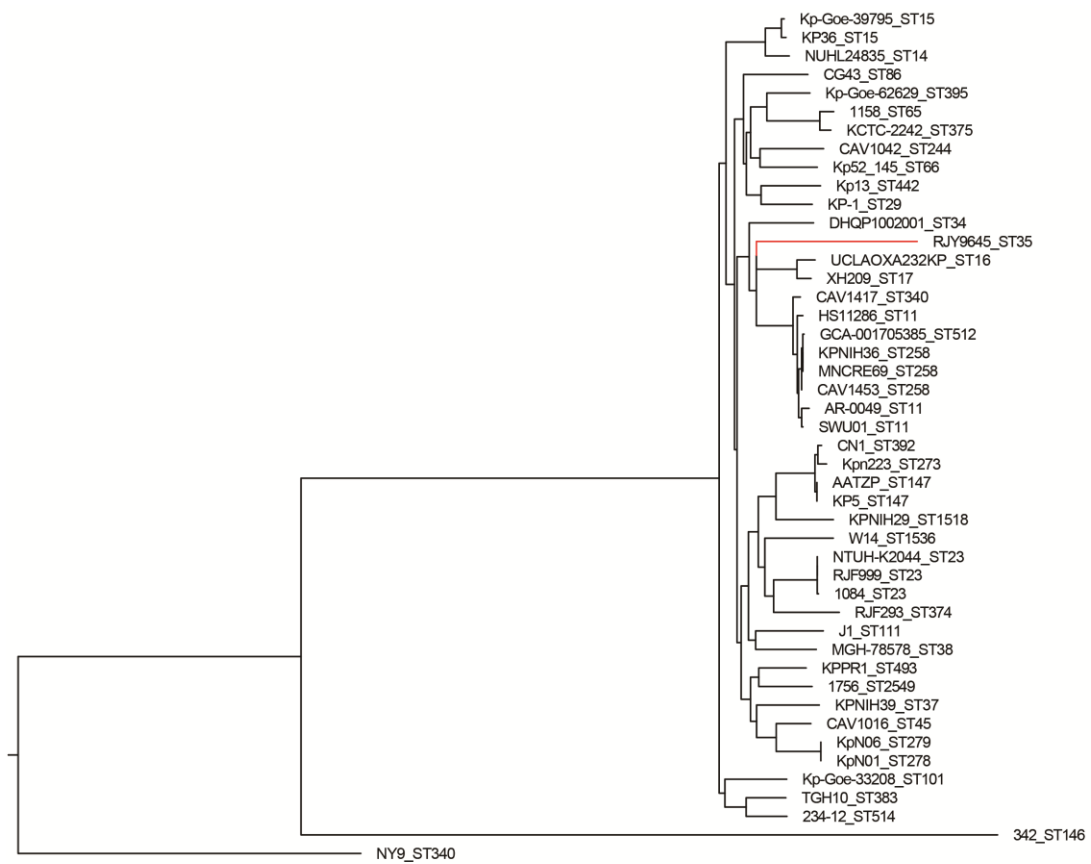

## REFERENCES

1. Ye M, Tu J, Jiang J, Bi Y, You W, Zhang Y, Ren J, Zhu T, Cao Z, Yu Z, Shao C, Shen Z, Ding B, Yuan J, Zhao X, Guo Q, Xu X, Huang J, Wang M. 2016. Clinical and genomic analysis of liver abscess-causing *Klebsiella pneumoniae* identifies new liver abscess-associated virulence genes. *Front Cell Infect Microbiol* 6: 165.
2. Poirel L, Walsh TR, Cuvillier V, Nordmann P. 2011. Multiplex PCR for detection of acquired carbapenemase genes. *Diagn Microbiol Infect Dis* 70: 119-123.
